# Supplementary material
Source: PubMed Central journal article supplement (PMC5915907)
Supplement: NIHMS942615-supplement-supplement_1.pdf [file NIHMS942615-supplement-supplement_1.pdf]

***Strong Hearts, Healthy Communities: A Community-Based Randomized Trial for Rural Women***

Rebecca A Seguin, Lynn Paul, Sara C. Folta, Miriam E. Nelson, David Strogatz, Meredith Graham, Anna Diffenderfer, Galen Eldridge, Stephen A. Parry

**Contact information:**

Rebecca A. Seguin, PhD, CSCS  
 Division of Nutritional Sciences  
 Savage Hall, Room 412  
 Cornell University  
 Ithaca, NY 14853 USA  
 Phone: 607.255.8250  
[rs946@cornell.edu](mailto:rs946@cornell.edu)

**Table S1: Life's Simple 7\* Components**

|                                                                                                                                                                                     | <b>Ideal</b>                                                                                                       | <b>Intermediate</b>                                                                                                   | <b>Poor</b>                    |
|-------------------------------------------------------------------------------------------------------------------------------------------------------------------------------------|--------------------------------------------------------------------------------------------------------------------|-----------------------------------------------------------------------------------------------------------------------|--------------------------------|
| <b>Smoking:</b> self-reported, participant questionnaire.                                                                                                                           | Never smoked                                                                                                       | Smoked, but not currently a smoker                                                                                    | Current smoker                 |
| <b>BMI:</b> calculated using measured height and weight from participant assessments.                                                                                               | BMI <25                                                                                                            | BMI ≥25                                                                                                               | BMI ≥30                        |
| <b>Physical activity:</b> self-reported, participant questionnaire (International Physical Activity Questionnaire (IPAQ)).                                                          | ≥150 minutes/week moderate or ≥75 minutes/week vigorous or ≥150 minutes/week moderate + vigorous physical activity | 1–149 minutes/week moderate or 1–74 minutes/week vigorous or 1–149 minutes/week moderate + vigorous physical activity | No physical activity           |
| <b>Healthy diet score:</b> self-reported, participant questionnaire (five components: fruits and vegetables; fish; fiber-rich whole grains; sodium; and sugar-sweetened beverages). | Met criteria for 4–5 components                                                                                    | Met criteria for 2–3 components                                                                                       | Met criteria for 0–1 component |
| <b>Total cholesterol:</b> measured, blood samples taken at assessments; medication use data was from the participant questionnaire.                                                 | <200 mg/dl, without medication                                                                                     | 200–239 mg/dL or treated to <200 mg/dL                                                                                | ≥240 mg/dL                     |
| <b>Blood pressure:</b> measured (automated) and averaged;                                                                                                                           | <120/<80 mmHg, without medication                                                                                  | systolic BP 120–139 or diastolic BP 80–89                                                                             | systolic BP ≥140 or            |

|                                                                                                                                         |                                |                                         |                             |
|-----------------------------------------------------------------------------------------------------------------------------------------|--------------------------------|-----------------------------------------|-----------------------------|
| medication use data was from the participant questionnaire.                                                                             |                                | mmHg, or treated to <120/<80 mmHg       | diastolic BP $\geq 90$ mmHg |
| <b>Fasting serum glucose:</b> measured, blood samples taken at assessments; medication use data was from the participant questionnaire. | <100 mg/dL, without medication | 100–125 mg/dL, or treated to <100 mg/dL | $\geq 126$ mg/dL            |

\*Lloyd-Jones DM, Hong Y, Labarthe D, Mozaffarian D, Appel LJ, Van Horn L, et al. Defining and setting national goals for cardiovascular health promotion and disease reduction: the American Heart Association's Strategic Impact Goal through 2020 and beyond. *Circulation*. 2010;121(4):586-613.

**Table S2: Within Group Changes in BMI, Weight, and CVD Risk Factors (Last Observation Carried Forward)**

|                                | <b>Unadjusted Model 1<sup>b</sup></b><br>(N range = 186-194) |                  |                                  |                  | <b>Multivariate Model 2<sup>c</sup></b><br>(N range = 186-194) |                  |                                  |                  |
|--------------------------------|--------------------------------------------------------------|------------------|----------------------------------|------------------|----------------------------------------------------------------|------------------|----------------------------------|------------------|
|                                | <i>Within Group Change (SHHC Intervention)</i>               |                  | <i>Within Group Change (CON)</i> |                  | <i>Within Group Change (SHHC Intervention)</i>                 |                  | <i>Within Group Change (CON)</i> |                  |
|                                | Mean Change <sup>d</sup><br>(SE)                             | <i>p</i> - value | Mean Change<br>(SE)              | <i>p</i> - value | Mean Change<br>(SE)                                            | <i>p</i> - value | Mean Change<br>(SE)              | <i>p</i> - value |
| BMI <sup>a</sup>               | <b>-0.65 (-0.91, -0.39)</b>                                  | <b>&lt;0.001</b> | -0.07 (-0.34, 0.20)              | 0.59             | <b>-0.56 (-0.92, -0.21)</b>                                    | <b>0.003</b>     | 0.02 (-0.33, 0.38)               | 0.90             |
| Weight, kg                     | <b>-1.82 (-2.62, -1.02)</b>                                  | <b>&lt;0.001</b> | -0.14 (-0.96, 0.68)              | 0.72             | <b>-1.56 (-2.54, -0.58)</b>                                    | <b>0.003</b>     | 0.14 (-0.87, 1.15)               | 0.78             |
| CRP                            | <b>-1.06 (-1.66, -0.46)</b>                                  | <b>&lt;0.001</b> | -0.02 (-0.64, 0.61)              | 0.96             | <b>-1.21 (-1.86, -0.55)</b>                                    | <b>&lt;0.001</b> | -0.10 (-0.78, 0.58)              | 0.77             |
| Simple 7                       | <b>0.68 (0.39, 0.97)</b>                                     | <b>&lt;0.001</b> | 0.21 (-0.09, 0.51)               | 0.16             | <b>0.55 (0.14, 0.96)</b>                                       | <b>0.009</b>     | 0.06 (-0.35, 0.48)               | 0.77             |
| ASCVD Risk                     | <b>-0.71 (-1.17, -0.24)</b>                                  | <b>0.003</b>     | -0.25 (-0.73, 0.24)              | 0.32             | <b>-0.76 (-1.20, -0.32)</b>                                    | <b>0.008</b>     | -0.32 (-0.75, 0.11)              | 0.14             |
| Waist to hip ratio             | -0.004 (-0.01, 0.0008)                                       | 0.52             | 0.0009 (-0.01, 0.01)             | 0.88             | -0.01 (-0.02, 0.007)                                           | 0.41             | 0.001 (-0.01, 0.01)              | 0.86             |
| Body fat, %                    | <b>-1.26 (-1.71, -0.81)</b>                                  | <b>&lt;0.001</b> | <b>-1.24 (-1.70, -0.77)</b>      | <b>&lt;0.001</b> | <b>-1.21 (-1.72, -0.70)</b>                                    | <b>&lt;0.001</b> | <b>-1.15 (-1.68, -0.62)</b>      | <b>&lt;0.001</b> |
| Resting heart rate             | <b>-2.24 (-3.70, -0.77)</b>                                  | <b>0.003</b>     | -0.87 (-2.40, 0.66)              | 0.26             | <b>-2.05 (-3.74, -0.36)</b>                                    | <b>0.02</b>      | -0.91 (-2.65, -0.84)             | 0.31             |
| Diastolic blood pressure, mmHg | <b>-5.11 (-7.72, -2.51)</b>                                  | <b>&lt;0.001</b> | <b>-3.43 (-6.07, -0.80)</b>      | <b>0.01</b>      | <b>-4.68 (-7.43, -1.93)</b>                                    | <b>0.002</b>     | <b>-3.03 (-5.83, -0.24)</b>      | <b>0.04</b>      |
| Systolic blood pressure, mmHg  | <b>-5.24 (-8.31, -2.17)</b>                                  | <b>0.003</b>     | <b>-3.09 (-6.24, 0.05)</b>       | <b>0.05</b>      | -2.79 (-6.66, 1.07)                                            | 0.15             | -0.96 (-4.89, 2.96)              | 0.62             |
| Waist circumference,           | <b>-2.64 (-4.77, -0.51)</b>                                  | <b>0.02</b>      | -1.42 (-3.57, 0.73)              | 0.18             | <b>-2.22 (-4.24, -0.20)</b>                                    | <b>0.03</b>      | -0.91 (-2.95, 1.13)              | 0.37             |

|                               |                             |                  |                                        |                  |                                 |                  |                                        |              |
|-------------------------------|-----------------------------|------------------|----------------------------------------|------------------|---------------------------------|------------------|----------------------------------------|--------------|
| cm                            |                             |                  | 0.72)                                  |                  | <b>0.21)</b>                    |                  | 1.14)                                  |              |
| Cholesterol (total),<br>mg/dL | 2.42 (-3.67, 8.50)          | 0.41             | <b>-6.87 (-<br/>13.06, -<br/>0.68)</b> | <b>0.03</b>      | 2.15 (-4.19,<br>8.49)           | 0.49             | <b>-7.00 (-<br/>13.44, -<br/>0.57)</b> | <b>0.03</b>  |
| HDL cholesterol,<br>mg/dL     | 0.75 (-1.41, 2.91)          | 0.47             | 0.40 (-1.80,<br>2.60)                  | 0.70             | 0.80 (-1.39,<br>3.00)           | 0.46             | 0.01 (-2.23,<br>2.25)                  | 0.99         |
| LDL cholesterol,<br>mg/dL     | -0.39 (-4.32, 3.54)         | 0.83             | <b>-5.41 (-9.44,<br/>-1.38)</b>        | <b>0.01</b>      | 0.10 (-4.58,<br>4.79)           | 0.96             | <b>-5.39 (-<br/>10.16, -<br/>0.62)</b> | <b>0.03</b>  |
| Triglycerides, mg/dL          | -3.86 (-15.38, 7.66)        | 0.48             | -7.02 (-<br>18.79, 4.75)               | 0.22             | 2.47 (-8.00,<br>12.93)          | 0.63             | -1.77 (-<br>12.50, 8.97)               | 0.74         |
| Fasting glucose,<br>mg/dL     | 2.16 (-1.21, 5.53)          | 0.21             | <b>4.16 (0.65,<br/>7.67)</b>           | <b>0.02</b>      | 3.24 (-0.63,<br>7.11)           | 0.10             | <b>5.40 (1.38,<br/>9.42)</b>           | <b>0.009</b> |
| Hemoglobin A1c                | <b>-0.23 (-0.33, -0.13)</b> | <b>&lt;0.001</b> | <b>-0.21 (-0.31,<br/>-0.11)</b>        | <b>&lt;0.001</b> | <b>-0.21 (-.32, -<br/>0.10)</b> | <b>&lt;0.001</b> | <b>-0.19 (-0.31,<br/>-0.08)</b>        | <b>0.002</b> |

Boldface indicates statistical significance ( $P \leq 0.05$ )

Abbreviations: ASCVD, atherosclerotic cardiovascular disease; BMI, body mass index (calculated as weight in kilograms divided by height in meters squared); CON, Strong Hearts, Healthy Women-Control; CRP, c-reactive protein; HDL, high density lipoprotein; LDL, low density lipoprotein; SHHC, Strong Hearts, Healthy Communities.

<sup>a</sup> Calculated as weight in kilograms divided by height in meters squared.

<sup>b</sup> Adjusted for Site

<sup>c</sup> Adjusted for Site, Education, Age, Marital Status, and Baseline Value of the Outcome

<sup>d</sup> Mean Change is Mean Change Baseline to Outcome (immediately following the six-month intervention) with last observation carried forward

**Table S3: Between Group Differences for Changes in BMI, Weight, and CVD Risk Factors (Last Observation Carried Forward)**

|                                | <b>Unadjusted Model 1<sup>b</sup></b><br><b>(N range = 186-194)</b> |                 | <b>Multivariate Model 2<sup>c</sup></b><br><b>(N range = 186-194)</b> |                 |
|--------------------------------|---------------------------------------------------------------------|-----------------|-----------------------------------------------------------------------|-----------------|
|                                | <i>Difference in Change between SHHC and CON</i>                    |                 | <i>Difference in Change between SHHC and CON</i>                      |                 |
|                                | Mean Difference (SE) <sup>d</sup>                                   | <i>p</i> -value | Mean Difference (SE) <sup>d</sup>                                     | <i>p</i> -value |
| BMI <sup>a</sup>               | <b>-0.58 (-0.95, -0.20)</b>                                         | <b>0.003</b>    | <b>-0.59 (-1.03, -0.14)</b>                                           | <b>0.01</b>     |
| Weight, kg                     | <b>-1.68 (-2.83, -0.54)</b>                                         | <b>0.007</b>    | <b>-1.70 (-2.96, -0.45)</b>                                           | <b>0.01</b>     |
| CRP                            | <b>-1.04 (-1.91, -0.18)</b>                                         | <b>0.02</b>     | <b>-1.11 (-1.89, -0.32)</b>                                           | <b>0.006</b>    |
| Simple 7                       | <b>0.47 (0.05, 0.88)</b>                                            | <b>0.03</b>     | <b>0.49 (0.09, 0.88)</b>                                              | <b>0.02</b>     |
| ASCVD Risk                     | -0.46 (-1.13, 0.21)                                                 | 0.18            | -0.36 (-0.97, 0.26)                                                   | 0.26            |
| Waist to hip ratio             | -0.004 (-0.02, 0.01)                                                | 0.58            | -0.01 (-0.02, 0.009)                                                  | 0.42            |
| Body fat, %                    | -0.02 (-0.67, 0.63)                                                 | 0.94            | -0.06 (-0.71, 0.59)                                                   | 0.85            |
| Resting heart rate             | -1.37 (-3.40, 0.75)                                                 | 0.20            | -1.14 (-3.15, 0.88)                                                   | 0.27            |
| Diastolic blood pressure, mmHg | -1.68 (-5.39, 2.02)                                                 | 0.35            | -1.65 (-5.30, 2.00)                                                   | 0.35            |
| Systolic blood pressure, mmHg  | -2.15 (-6.54, 2.25)                                                 | 0.31            | -1.83 (-6.93, 3.27)                                                   | 0.45            |
| Waist circumference, cm        | -1.22 (-4.24, 1.81)                                                 | 0.40            | -1.32 (-4.06, 1.42)                                                   | 0.32            |
| Cholesterol (total), mg/dL     | <b>9.29 (0.61, 17.97)</b>                                           | <b>0.04</b>     | <b>9.15 (-0.86, 17.44)</b>                                            | <b>0.03</b>     |
| HDL cholesterol, mg/dL         | 0.35 (-2.73, 3.43)                                                  | 0.81            | 0.79 (-2.06, 3.64)                                                    | 0.56            |
| LDL cholesterol, mg/dL         | 5.02 (-0.61, 10.65)                                                 | 0.08            | 5.49 (-0.40, 11.39)                                                   | 0.07            |

|                        |                      |      |                     |      |
|------------------------|----------------------|------|---------------------|------|
| Triglycerides, mg/dL   | 3.16 (-13.31, 19.62) | 0.69 | 4.24 (-8.85, 17.33) | 0.50 |
| Fasting glucose, mg/dL | -2.00 (-6.87, 2.86)  | 0.42 | -2.16 (-6.79, 2.47) | 0.36 |
| Hemoglobin A1c         | -0.02 (-0.17, 0.12)  | 0.77 | -0.02 (-0.17, 0.13) | 0.79 |

Boldface indicates statistical significance ( $P \leq .05$ )

Abbreviations: ASCVD, atherosclerotic cardiovascular disease; BMI, body mass index (calculated as weight in kilograms divided by height in meters squared); CON, Strong Hearts, Healthy Women-Control; CRP, c-reactive protein; HDL, high density lipoprotein; LDL, low density lipoprotein; SHHC, Strong Hearts, Healthy Communities.

<sup>a</sup> Calculated as weight in kilograms divided by height in meters squared.

<sup>b</sup> Adjusted for Site

<sup>c</sup> Adjusted for Site, Education, Age, Marital Status, and Baseline Value of the Outcome

<sup>d</sup> Mean Group Difference is difference in change between Intervention and Control with last observation carried forward
